# Supplementary material
Source: Springer Nature journal article supplement (https://www.springermedizin.de/resource/supplementary/12916_2014_979_MOESM2_ESM.pdf/9598968)

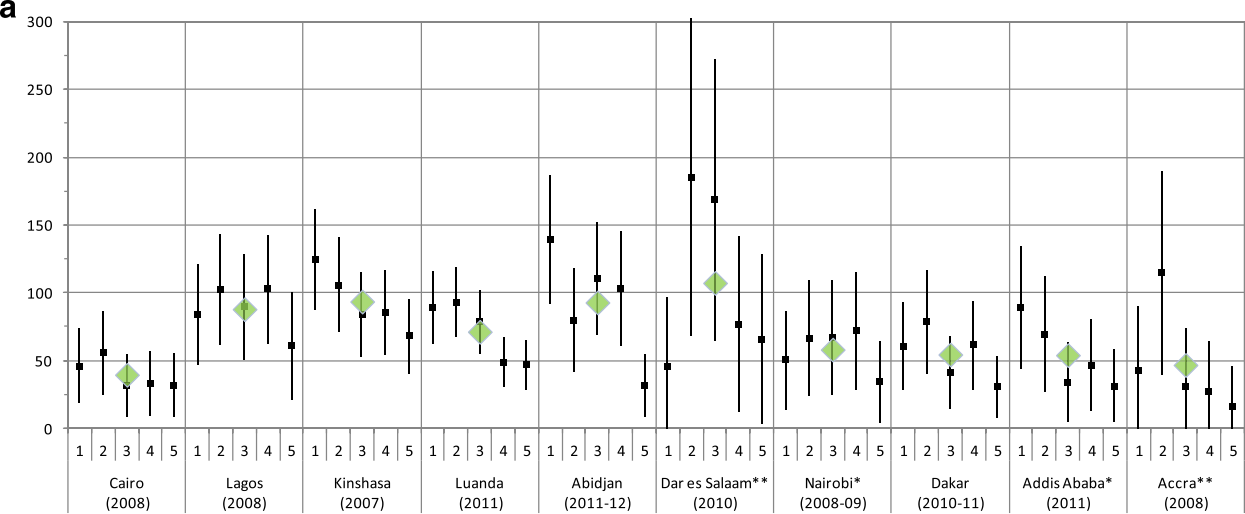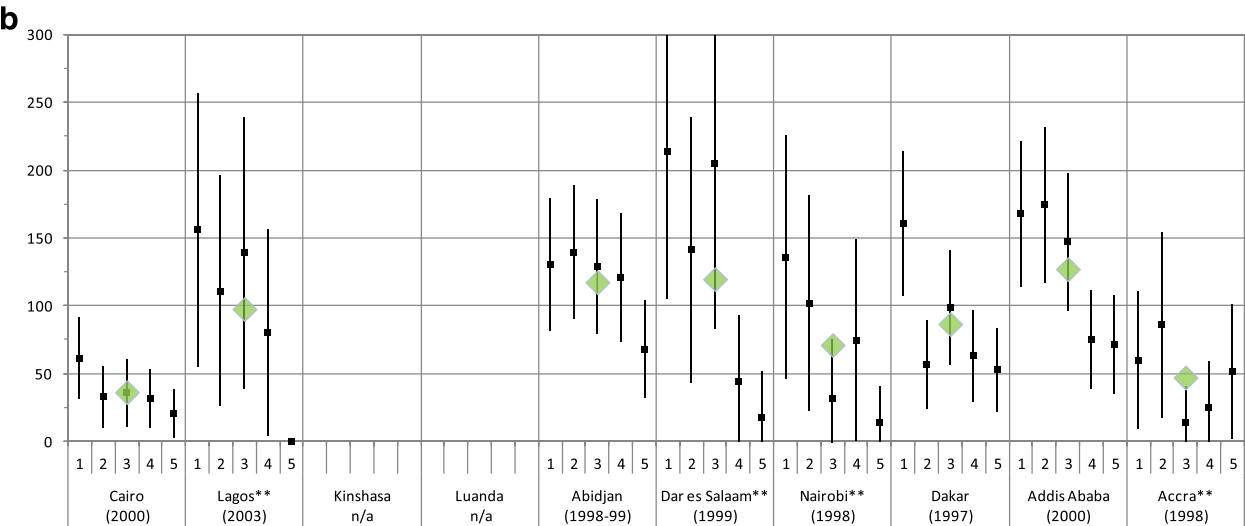

Supplement: MOESM2 [file 9598968]
